# Supplementary material for: Trends in Bronchiolitis ICU Admissions and Ventilation Practices: 2010–2019
Source: Oxford University Press journal article supplement (doi:10.1542/peds.2020-039115), 2021-05-10
Supplement: peds_2020039115supplementarydata.docx [file peds_2020039115supplementarydata.docx]

Please visit [https://rpubs.com/drjonpelly/bronchiolitis_phis_supplement](https://urldefense.com/v3/__https:/linkprotect.cudasvc.com/url?a=https*3a*2f*2frpubs.com*2fdrjonpelly*2fbronchiolitis_phis_supplement&c=E,1,DAOI_XHouI_VEbJ8Uspa-0ZL1ZoVK--m0phYu9prqcK102NGV10e1yZganfhZyvSsWcPGpYZlcftHdw99NcbmpPUZ8-9a5W5uB5XX9jreg,,&typo=1__;JSUlJSU!!NHLzug!b-NdqYJK2IqfZQhsGuztB5ZFjkFFXBtxJF2V1N-QJ760jVV9aGUwMOplz4DI0lSlqUX76wQ$) to view this article’s Supplemental Information.
